# Supplementary material for: Novel features of telomere biology revealed by the absence of telomeric DNA methylation
Source: HighWire-hosted journal article supplement (doi:10.1101/gr.202465.115), 2016-07-12
Supplement: Supplemental_Table_S1.xlsx [file Supplemental_Table_S1.xlsx]

## Sheet: Hoja1
Supplemental Table S1. Estimation of the telomeric and mitochondrial cytosine methylation levels from different genome wide bisulfite genomic sequencing studies.
Reference	GEO study	SRA study	Run	Genotype	Source	Reads length	Total nº of reads	nº of mapped reads	nº of mapped reads flagged as unconverted	% of mapped reads flagged as unconverted	nº of 50TRs	50TRPE (% x 10-4)	nº of Cs in all the 50TRs	% of unconverted Cs in 50TRs	nº 50 bp long (TTTTAAA)n reads	% of 50 bp long (TTTTAAA)n reads within 50TRs	% of C containing 50TRs	nº of 50TRs with 0 to 22 Cs	nº of Mit reads	MitRPE (%)	% of unconverted Mit Cs	PCC (Mit coverage and CG)	PCC (Mit Cs unconversion and CG)
1	GSE36143	SRP011129	SRR420834	WT (Col-0)	Leaves	50	267020201	114339887	1715560	1.5004	59	0.516005	220	17.7563	33	55.9322	44.0678	33, 2, 1, 1, 4, 2, 3, 2, 3, 0, 0, 0, 0, 0, 2, 0, 4, 0, 0, 1, 1, 0, 0	989346	0.865268	8.29278	-0.00679995	0.31179
2	GSE37644	SRP012587	SRR493048	WT (Col-0)	Leaves	50	169056790	43789784	432609	0.987922	276	6.30284	313	5.40028	212	76.8116	23.1884	212, 34, 7, 1, 3, 0, 5, 2, 2, 0, 0, 0, 1, 0, 0, 0, 0, 0, 1, 4, 1, 2, 1	475033	1.0848	4.06774	0.00822648	0.0652223
3	GSE39247	SRP014189	SRR520367	WT (Col-0)	Seedlings	50	160377581	92902862	520680	0.560456	878	9.45073	338	1.83317	821	93.508	6.49203	821, 24, 7, 2, 3, 1, 5, 1, 1, 0, 1, 1, 0, 0, 0, 0, 0, 1, 1, 4, 5, 0, 0	914628	0.984499	2.74405	-0.0827242	0.0238091
4	GSE45368	SRP019835	SRR788221	WT (Col-0)	Seedlings	50	246622339	109954856	850048	0.773088	1040	9.45843	843	3.85989	908	87.3077	12.6923	908, 52, 14, 6, 3, 7, 5, 5, 5, 2, 1, 2, 1, 1, 3, 0, 2, 4, 3, 5, 6, 3, 2	1561394	1.42003	2.90895	0.0105705	0.080294
5	GSE49090	SRP028132	SRR942034	WT (Col-0)	Leaves	50	244827458	108827397	1076792	0.989449	131	1.20374	395	14.3584	79	60.3053	39.6947	79, 8, 7, 6, 3, 4, 4, 2, 2, 1, 1, 0, 0, 2, 0, 1, 1, 2, 0, 3, 3, 2, 0, 0	824217	0.757362	6.91247	0.0204554	0.169737
6	GSE51304	SRP030646	SRR1005412	WT (Col-0)	Leaves	51	217614064	98425899	792217	0.804887	1476	14.9961	1396	4.50381	1272	86.1789	13.8211	1272, 71, 22, 13, 9, 10, 10, 9, 1, 2, 3, 2, 2, 1, 2, 2, 6, 1, 9, 9, 11, 5, 3, 1	673136	0.683901	5.20158	-0.000885888	0.165143
7	GSE38286	SRP013427	SRR501624	WT (Col-0)	Leaves	50	177708979	68382032	618778	0.904884	787	11.5089	617	3.73328	684	86.9123	13.0877	684, 29,14,7, 6, 4, 6, 12, 5,2, 0, 0, 1, 1, 0, 1, 4, 1, 1, 3, 5, 1, 0	380237	0.556048	5.62504	-0.115095	0.181485
8	GSE39901	SRP014726	SRR534177	WT (Col-0)	Leaves	50	158882865	71157626	1258254	1.76826	36	0.505919	201	26.5873	19	52.7778	47.2222	19, 2, 0, 0, 1, 1, 1, 2, 0, 0, 1, 0, 1, 1, 0, 0, 1, 0, 0, 2, 3, 1, 0, 0	355270	0.499272	13.2969	0.0249065	0.263444
8	GSE39901	SRP014726	SRR534193	WT (Col-0)	Leaves	50	112564237	41678792	332433	0.797607	47	1.12767	72	7.29483	33	70.2128	29.7872	33, 7, 0, 0, 0, 0, 3, 1, 1, 0, 0, 0, 0, 0, 1, 0, 0, 0, 1, 0, 0, 0, 0, 0	324938	0.779624	5.29152	-0.0470898	0.184081
8	GSE39901	SRP014726	SRR534239	met1 (Col-0)	Leaves	50	282849630	133794764	966389	0.722292	585	4.37237	797	6.48759	463	79.1453	20.8547	463, 38, 14, 7, 4, 4, 9, 11, 6, 1, 1, 1, 1, 2, 3, 1, 2, 1, 7, 3, 4, 1, 0	934930	0.698779	2.22727	0.0622862	0.0840619
8	GSE39901	SRP014726	SRR534240	met1, cmt3 (Col-0)	Leaves	50	241165032	126316556	557757	0.441555	328	2.59665	632	9.17538	250	76.2195	23.7805	250, 13,3, 2, 5, 8, 7, 11, 2, 0, 0, 3, 5, 3, 2, 3, 0, 1, 6, 1, 1, 1, 1	842130	0.666682	0.932055	0.0300606	0.137569
8	GSE39901	SRP014726	SRR534224	drm1, drm2, cmt3(Col-0)	Leaves	50	274330163	112591135	413594	0.367342	325	2.88655	391	5.72894	268	82.4615	17.5385	268, 7, 7, 3, 4, 6, 12, 4, 3, 1, 0, 0, 1, 0, 0, 0, 0, 3, 0, 7, 3, 1, 0	516648	0.458871	6.20515	-0.0670415	0.229091
8	GSE39901	SRP014726	SRR869314	cmt2(Col-0)	Leaves	50	231693308	70415460	895474	1.2717	81	1.15032	425	24.9853	56	69.1358	30.8642	56, 1, 1, 0, 0, 0, 0, 1, 0, 1, 1, 0, 0, 0, 0, 1, 1, 1, 2, 9, 5, 1,0	363762	0.516594	6.78665	-0.0592601	0.184403
9	GSE41302	SRP015983	SRR578938	WT (Col-0)	Shoots	100	11314145	4648466	30307	0.651979	222	47.7577	71	1.52295	199	89.6396	10.3604	199, 11, 8, 0, 0, 1, 0, 0, 0, 0, 2, 0, 0, 0, 0, 0, 0, 0, 0, 1, 0, 0, 0	32312	0.695111	2.49648	-0.155371	0.0332683
9	GSE41302	SRP015983	SRR578937	WT (Col-0)	Roots	76	24144173	4657013	29990	0.643975	15	3.22095	52	16.5079	6	40	60	6, 0, 1, 2, 1, 1, 1, 1, 1, 0, 0, 0, 0, 0, 1, 0, 0, 0, 0, 0, 0, 0, 0	74945	1.60929	1.97448	0.128952	-0.0238259
9	GSE41302	SRP015983	SRR578927	ddm1(Col-0)	Roots	76	20474056	3561636	15457	0.433986	19	5.33463	84	21.0526	3	15.7895	84.2105	3, 1, 0, 0, 4, 3, 4, 4, 0, 0, 0, 0, 0, 0, 0, 0, 0, 0, 0, 0, 0, 0, 0	62959	1.7677	0.117101	0.0883585	-0.0230953
9	GSE41302	SRP015983	SRR578931	drd1(Col-0)	Roots	76	21361515	4589523	14619	0.31853	13	2.83254	21	7.69231	8	61.5385	38.4615	8, 1, 1, 0, 0, 1, 1, 1, 0, 0, 0, 0, 0, 0, 0, 0, 0, 0, 0, 0, 0, 0, 0	60234	1.31242	2.40551	0.135963	-0.0406511
9	GSE41302	SRP015983	SRR578928	ddm1, drd1 (Col-0)	Shoots	50	40047815	23233713	5759	0.0247873	12	0.516491	39	15.4762	3	25	75	3, 1, 0, 2, 0, 5, 0, 1, 0, 0, 0, 0, 0, 0, 0, 0, 0, 0, 0, 0, 0, 0, 0	260393	1.12075	0.193275	0.0298859	-0.0274413
10		SRP008122	SRR342382	WT (Col-0)	Leaves	101	96194588	13866006	316102	2.27969	34	2.45204	289	40.4762	4	11.7647	88.2353	4, 1, 0, 1, 0, 2, 8, 4, 1, 2, 1, 0, 2, 0, 2, 1, 0, 0, 1, 2, 2, 0, 0	40885	0.294858	7.59838	-0.365787	0.0266633
11		SRP012576	SRR492931	WT (Col-0)	Leaves	50	7102459	1647663	13360	0.810845	9	5.46228	17	8.99471	5	55.5556	44.4444	5, 0, 1, 0, 1, 1, 1, 0, 0, 0, 0, 0, 0, 0, 0, 0, 0, 0, 0, 0, 0, 0, 0	2515	0.15264	23.4318	-0.251769	0.186159
11		SRP012576	SRR492932	WT (Col-0)	Leaves	82	18512969	8612867	183981	2.13612	32	3.71537	77	11.4583	13	40.625	59.375	13, 7, 0, 1, 2, 3, 2, 2, 1, 0, 1, 0, 0, 0, 0, 0, 0, 0, 0, 0, 0, 0, 0	20936	0.243078	26.6599	-0.165166	0.324711
11		SRP012576	SRR493025	WT (Col-0)	Leaves	82	18904525	7149355	101343	1.41751	19	2.65758	129	32.3308	3	15.7895	84.2105	3, 0, 0, 1, 2, 1, 3, 3, 3, 0, 0, 0, 0, 0, 0, 1, 0, 1, 1, 0, 0, 0, 0	17864	0.249869	18.9296	-0.131666	0.208112
11		SRP012576	SRR493066	WT (Col-0)	Leaves	87	30228036	8557334	129300	1.51098	19	2.22032	91	22.807	6	31.5789	68.4211	6, 2, 0, 1, 2, 2, 1, 2, 0, 0, 1, 0, 0, 0, 0, 0, 0, 0, 1, 0, 1, 0, 0	22268	0.260221	18.3867	-0.125681	0.170203
References
1. Proc Natl Acad Sci U S A. 2012 May 29;109(22):8374-81. doi: 10.1073/pnas.1206638109. Epub 2012 May 16.
INVOLVED IN DE NOVO 2-containing complex involved in RNA-directed DNA methylation in Arabidopsis.
Ausin I, Greenberg MV, Simanshu DK, Hale CJ, Vashisht AA, Simon SA, Lee TF, Feng S, Española SD, Meyers BC, Wohlschlegel JA, Patel DJ, Jacobsen SE.
2. Science. 2012 Jun 15;336(6087):1448-51. doi: 10.1126/science.1221472. Epub 2012 May 3.
MORC family ATPases required for heterochromatin condensation and gene silencing.
Moissiard G, Cokus SJ, Cary J, Feng S, Billi AC, Stroud H, Husmann D, Zhan Y, Lajoie BR, McCord RP, Hale CJ, Feng W, Michaels SD, Frand AR, Pellegrini M, Dekker J, Kim JK, Jacobsen SE.
3. Nat Struct Mol Biol. 2012 Sep;19(9):870-5. doi: 10.1038/nsmb.2354. Epub 2012 Aug 5.
DDR complex facilitates global association of RNA polymerase V to promoters and evolutionarily young transposons.
Zhong X, Hale CJ, Law JA, Johnson LM, Feng S, Tu A, Jacobsen SE.
4. Nature. 2013 Jun 20;498(7454):385-9. doi: 10.1038/nature12178. Epub 2013 May 1.
Polymerase IV occupancy at RNA-directed DNA methylation sites requires SHH1.
Law JA, Du J, Hale CJ, Feng S, Krajewski K, Palanca AM, Strahl BD, Patel DJ, Jacobsen SE.
5. PLoS Genet. 2013 Nov;9(11):e1003946. doi: 10.1371/journal.pgen.1003946. Epub 2013 Nov 7.
Interplay between active chromatin marks and RNA-directed DNA methylation in Arabidopsis thaliana.
Greenberg MV, Deleris A, Hale CJ, Liu A, Feng S, Jacobsen SE.
6. Nat Struct Mol Biol. 2014 Jan;21(1):64-72. doi: 10.1038/nsmb.2735. Epub 2013 Dec 15.
Non-CG methylation patterns shape the epigenetic landscape in Arabidopsis.
Stroud H, Do T, Du J, Zhong X, Feng S, Johnson L, Patel DJ, Jacobsen SE.
7. PLoS Genet. 2012 Jul;8(7):e1002808. doi: 10.1371/journal.pgen.1002808. Epub 2012 Jul 5.
DNA methyltransferases are required to induce heterochromatic re-replication in Arabidopsis.
Stroud H, Hale CJ, Feng S, Caro E, Jacob Y, Michaels SD, Jacobsen SE.
8. Cell. 2013 Jan 17;152(1-2):352-64. doi: 10.1016/j.cell.2012.10.054. Epub 2013 Jan 11.
Comprehensive analysis of silencing mutants reveals complex regulation of the Arabidopsis methylome.
Stroud H, Greenberg MV, Feng S, Bernatavichute YV, Jacobsen SE.
9. Cell. 2013 Mar 28;153(1):193-205. doi: 10.1016/j.cell.2013.02.033.
The Arabidopsis nucleosome remodeler DDM1 allows DNA methyltransferases to access H1-containing heterochromatin.
Zemach A, Kim MY, Hsieh PH, Coleman-Derr D, Eshed-Williams L, Thao K, Harmer SL, Zilberman D
10. Science. 2011 Oct 21;334(6054):369-73. doi: 10.1126/science.1212959. Epub 2011 Sep 15.
Transgenerational epigenetic instability is a source of novel methylation variants.
Schmitz RJ, Schultz MD, Lewsey MG, O'Malley RC, Urich MA, Libiger O, Schork NJ, Ecker JR.
11. Proc Natl Acad Sci U S A. 2012 Aug 7;109(32):E2183-91. doi: 10.1073/pnas.1209329109. Epub 2012 Jun 25.
Widespread dynamic DNA methylation in response to biotic stress.
Dowen RH, Pelizzola M, Schmitz RJ, Lister R, Dowen JM, Nery JR, Dixon JE, Ecker JR.
